# Supplementary material for: Gold Nanoparticles-MWCNT Based Aptasensor for Early Diagnosis of Prostate Cancer
Source: MDPI journal article supplement (doi:10.3390/bios12121130), 2022-12-06
Supplement: s1 [file s1]

# Gold Nanoparticles-MWCNT Based Aptasensor for Early Diagnosis of Prostate Cancer

Aseel Alnaimi <sup>1,2,\*</sup>, Ammar Al-Hamry <sup>2</sup>, Yahia Makableh <sup>3</sup>, Anurag Adiraju <sup>2</sup> and Olfa Kanoun <sup>2,\*</sup>

<sup>1</sup> Biomedical Engineering Department, Jordan University of Science and Technology, Irbid 22110, Jordan

<sup>2</sup> Professorship Measurement and Sensor Technology, Chemnitz University of Technology, 09111 Chemnitz, Germany

<sup>3</sup> Institute of Nanotechnology, Jordan University of Science and Technology, Irbid 22110, Jordan

\* Correspondence: aalnaimi18@eng.just.edu.jo (A.A.); olfa.kanoun@etit.tu-chemnitz.de (O.K.)

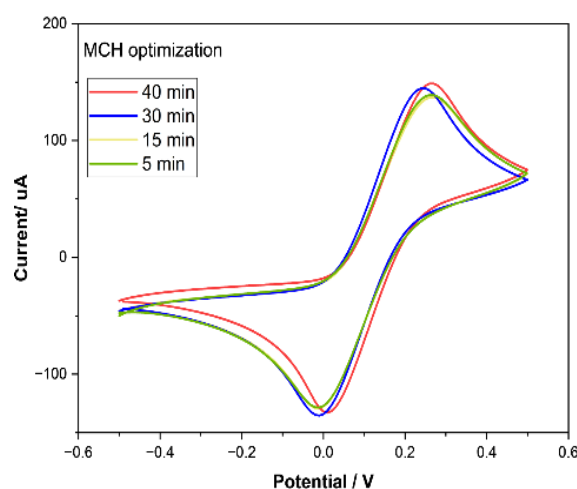

**Figure S1.** Cyclic voltammetry of MCH/aptamer/MWCNT-AuNPs incubation process with different time to optimize the efficacy of blocking non-specific sides of suggested aptamer.

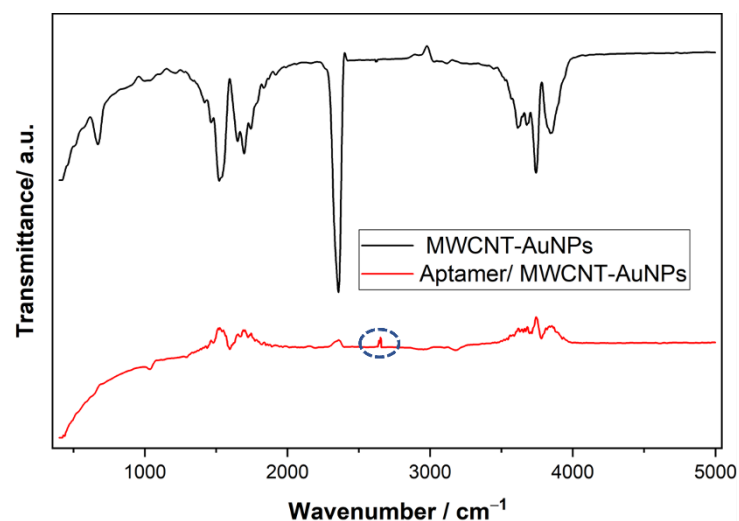

**Figure S2.** FT-IR of MWCNT-AuNPs electrode and immobilized electrode, with the thiol bond (assigned by dashed circle).
